# Supplementary material for: Internal Validation of MaSTR™ Probabilistic Genotyping Software for the Interpretation of 2–5 Person Mixed DNA Profiles
Source: MDPI journal article supplement (doi:10.3390/genes13081429), 2022-08-11
Supplement: s1 [file s1]

## Supplementary materials

**Supplementary Table S1.** Summary of the calculated random match probability (RMP) values for a single source donor (1692) at each locus and complete genotype using the HWE, NRC 4.1, and NRC 4.2 recommended formulae in Microsoft Excel spreadsheet and MaSTR™ to assess accuracy.

| Locus    | Genotype | Excel<br>HWE          | MaSTR<br>HWE          | Excel<br>(Rec. 4.1<br>F=0.01) | MaSTR<br>(Rec. 4.1<br>F=0.01) | Excel<br>(Rec. 4.2 $\theta$<br>=0.01) | MaSTR<br>(Rec. 4.2 $\theta$<br>=0.01) |
|----------|----------|-----------------------|-----------------------|-------------------------------|-------------------------------|---------------------------------------|---------------------------------------|
| D3S1358  | 14, 16   | 20.2370               | $2.02 \times 10^1$    | 20.2370                       | $2.02 \times 10^1$            | 18.4094                               | $1.84 \times 10^1$                    |
| D1S1656  | 16, 16.3 | 51.6087               | $5.16 \times 10^1$    | 51.6087                       | $5.16 \times 10^1$            | 44.1061                               | $4.41 \times 10^1$                    |
| D2S441   | 10, 15   | 62.9509               | $6.30 \times 10^1$    | 62.9509                       | $6.30 \times 10^1$            | 50.0913                               | $5.01 \times 10^1$                    |
| D10S1248 | 14, 14   | 11.4250               | $1.14 \times 10^1$    | 11.1594                       | $1.12 \times 10^1$            | 10.1969                               | $1.02 \times 10^1$                    |
| D13S317  | 10, 12   | 27.8841               | $2.79 \times 10^1$    | 27.8841                       | $2.79 \times 10^1$            | 24.2145                               | $2.42 \times 10^1$                    |
| Penta E  | 12, 16   | 61.5728               | $6.16 \times 10^1$    | 61.5728                       | $6.16 \times 10^1$            | 50.7644                               | $5.08 \times 10^1$                    |
| D16S539  | 9, 10    | 28.4365               | $2.84 \times 10^1$    | 28.4365                       | $2.84 \times 10^1$            | 25.7375                               | $2.57 \times 10^1$                    |
| D18S51   | 14, 17   | 29.0223               | $2.90 \times 10^1$    | 29.0223                       | $2.90 \times 10^1$            | 26.3015                               | $2.63 \times 10^1$                    |
| D2S1338  | 19, 23   | 28.4472               | $2.84 \times 10^1$    | 28.4472                       | $2.84 \times 10^1$            | 25.7952                               | $2.58 \times 10^1$                    |
| CSF1PO   | 10, 12   | 6.2505                | $6.25 \times 10^0$    | 6.2505                        | $6.25 \times 10^0$            | 6.1167                                | $6.12 \times 10^0$                    |
| Penta D  | 11, 11   | 41.1493               | $4.11 \times 10^1$    | 39.0357                       | $3.90 \times 10^1$            | 32.0588                               | $3.21 \times 10^1$                    |
| TH01     | 6, 6     | 26.0441               | $2.60 \times 10^1$    | 25.0175                       | $2.50 \times 10^1$            | 21.4930                               | $2.15 \times 10^1$                    |
| vWA      | 14, 17   | 19.9653               | $2.00 \times 10^1$    | 19.9653                       | $2.00 \times 10^1$            | 18.2753                               | $1.83 \times 10^1$                    |
| D21S11   | 31, 31.2 | 80.8163               | $8.08 \times 10^1$    | 80.8163                       | $8.08 \times 10^1$            | 66.7105                               | $6.67 \times 10^1$                    |
| D7S820   | 11, 12   | 15.5985               | $1.56 \times 10^1$    | 15.5985                       | $1.56 \times 10^1$            | 14.6354                               | $1.46 \times 10^1$                    |
| D5S818   | 11, 11   | 10.0685               | $1.01 \times 10^1$    | 9.8543                        | $9.85 \times 10^0$            | 9.0732                                | $9.07 \times 10^0$                    |
| TPOX     | 8, 8     | 4.6006                | $4.60 \times 10^0$    | 4.5485                        | $4.55 \times 10^0$            | 4.3520                                | $4.35 \times 10^0$                    |
| D8S1179  | 12, 13   | 13.1320               | $1.31 \times 10^1$    | 13.1320                       | $1.31 \times 10^1$            | 12.4185                               | $1.24 \times 10^1$                    |
| D12S391  | 19.2, 21 | 2056.7947             | $2.05 \times 10^3$    | 2056.7950                     | $2.05 \times 10^3$            | 378.5465                              | $3.78 \times 10^2$                    |
| D19S433  | 14, 16.2 | 70.9739               | $7.10 \times 10^1$    | 70.9739                       | $7.10 \times 10^1$            | 50.2824                               | $5.03 \times 10^1$                    |
| FGA      | 20, 26   | 114.9955              | $1.15 \times 10^2$    | 114.9956                      | $1.15 \times 10^2$            | 90.0018                               | $9.00 \times 10^1$                    |
| D22S1045 | 15, 16   | 5.2400                | $5.24 \times 10^0$    | 5.2400                        | $5.24 \times 10^0$            | 5.1644                                | $5.16 \times 10^0$                    |
|          |          | $2.73 \times 10^{32}$ | $2.73 \times 10^{32}$ | $2.35 \times 10^{32}$         | $2.35 \times 10^{32}$         | $2.90 \times 10^{30}$                 | $2.90 \times 10^{30}$                 |

**Supplementary Table S2.** Random match probabilities (RMPs) for each of the true contributor genotypes used calculated by hand and using MaSTR™ with the NRC 4.1 equation.

| Contributor | Random Match Probability<br>calculated by hand | Random Match Probability<br>calculated by MaSTR™ |
|-------------|------------------------------------------------|--------------------------------------------------|
| 1653        | $1.45 \times 10^{-34}$                         | $1.45 \times 10^{-34}$                           |
| 1657        | $8.57 \times 10^{-35}$                         | $8.58 \times 10^{-35}$                           |

|      |                        |                        |
|------|------------------------|------------------------|
| 1658 | $2.30 \times 10^{-26}$ | $2.30 \times 10^{-26}$ |
| 1659 | $5.39 \times 10^{-32}$ | $5.39 \times 10^{-32}$ |
| 1660 | $2.72 \times 10^{-29}$ | $2.72 \times 10^{-29}$ |
| 1665 | $7.18 \times 10^{-37}$ | $7.17 \times 10^{-37}$ |
| 1666 | $1.64 \times 10^{-33}$ | $1.63 \times 10^{-33}$ |
| 1668 | $9.57 \times 10^{-30}$ | $9.57 \times 10^{-30}$ |
| 1669 | $2.44 \times 10^{-29}$ | $2.44 \times 10^{-29}$ |
| 1670 | $9.91 \times 10^{-31}$ | $9.90 \times 10^{-31}$ |
| 1678 | $9.23 \times 10^{-34}$ | $9.22 \times 10^{-34}$ |
| 1679 | $6.06 \times 10^{-36}$ | $6.05 \times 10^{-36}$ |
| 1681 | $5.08 \times 10^{-34}$ | $5.08 \times 10^{-34}$ |
| 1682 | $3.61 \times 10^{-31}$ | $3.61 \times 10^{-31}$ |
| 1683 | $4.86 \times 10^{-29}$ | $4.85 \times 10^{-29}$ |
| 1686 | $1.52 \times 10^{-31}$ | $1.52 \times 10^{-31}$ |
| 1690 | $7.95 \times 10^{-29}$ | $7.95 \times 10^{-29}$ |
| 1693 | $4.53 \times 10^{-30}$ | $4.52 \times 10^{-30}$ |

**Supplementary Table S3.** Manual calculations to evaluate LR for the major contributor given the weighted genotypes from MCMC in the MaSTR™ software. Mixture 2-person\_1v10m\_1660\_1693 (~6:63 pg) was selected to manually test concordance. The mixture had two persons with high allele sharing, and the reference (POI) was defined as genotype 1693 (alleles 10, 11; major contributor) while the minor contributor genotype 1660 (alleles 10, 14) was defined as a known. The calculations were performed without co-ancestry adjustment and incorporated the possibility of Drop-out alleles, defined as Q alleles. The results from the D2S441 locus are shown as an example analyzed using the All Data allele frequencies from the Hill *et al* database [35]. The upper panel shows the manual setup of the LR and the hand calculations for 1693 given the four combinations of genotypes with the highest weights. The lower panel shows the results from MaSTR™ for 1693 in the highlighted locus. Additional loci demonstrated concordant LR's when treated in the same way.

$$LR = \frac{\Pr(E|Hp)}{\Pr(E|Hd)}$$

$\Pr(E|Hp)$  – all the evidence can be explained by victim and person of interest genotypes

$\Pr(E|Hd)$  – evidence can be explained by victim and an unknown person (DNA originated from either 10,11 or 11,11 or 11,14 or 11,Q

$$\Pr(E|Hd) = 0.9463 \times 2 \times f_{10} \times f_{11} + 0.0445 \times f_{11} \times f_{11} + 0.0092 \times 2 \times f_{11} \times f_{14} + 0.0001 \times 2 \times f_{11} \times f_Q$$

$f_Q = 1 - \text{sum of the frequencies of non-dropout alleles (alleles detected in the mixture)}$

$$1 - (0.20319 + 0.34025 + 0.22683) = 0.22973$$

$$\Pr(E|Hd) = 0.130845653 + 0.005151768 + 0.001420092 + 0.0000156531$$

$$\Pr(E|Hd) = 0.137433146 \text{ (denominator in result table from MaSTR at top)}$$

$\Pr(E|Hp)$  = weight of the 10,11 genotype from MCMC above (would be 1 in binary method)

$$LR = 0.9463 / 0.1374 = 6.89$$

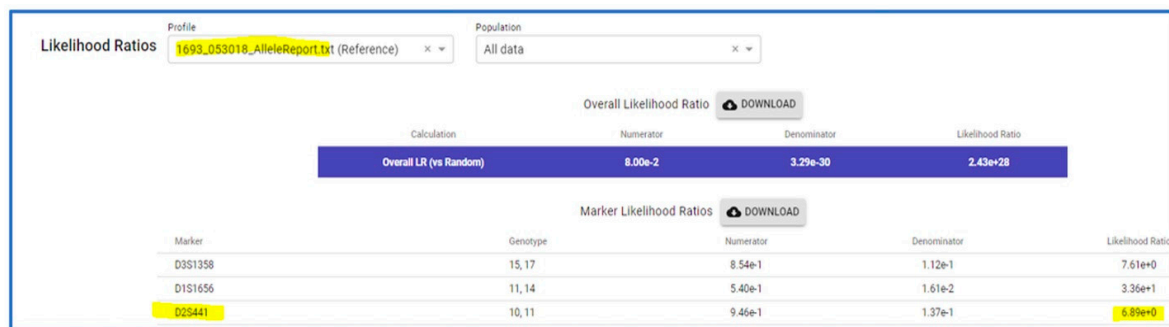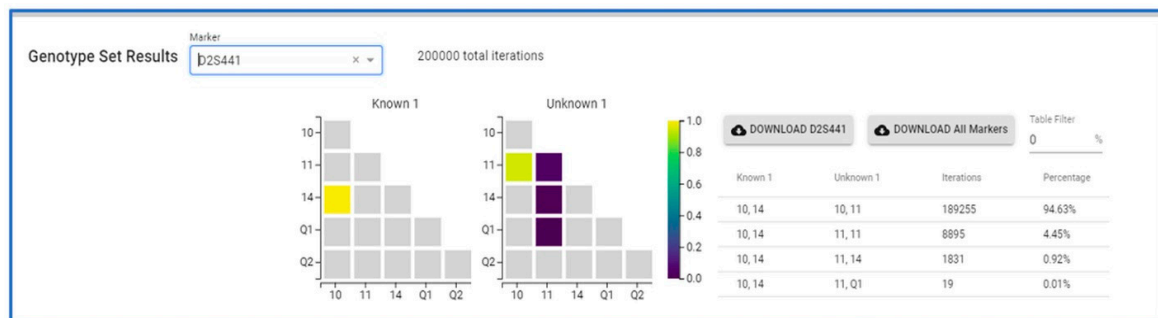

**Supplementary Table S4.** Comparison of LR calculations performed by hand using the MaSTR™ weighted modeled probabilities, LR calculations performed by MaSTR™, and LR calculations performed by hand using unweighted probabilities from the intuitive major contributor. Mixture 2-person\_1v10m\_1660\_1693 (~6.63 pg) was selected to manually evaluate concordance. The mixture had two contributors with high allele sharing, and the major contributor reference (POI) was defined as genotype 1693 while the minor contributor genotype 1660 was defined as a known. The calculations with weighted probabilities were performed without co-ancestry adjustment and incorporated the possibility of Drop-out alleles, defined as Q alleles. The calculations using unweighted probabilities considered only the most intuitive major contributor.

| Locus | Contributor 1693<br>Genotype | LR calculated by<br>hand using | LR calculated by<br>MaSTR™ using | LR calculated by<br>hand using |
|-------|------------------------------|--------------------------------|----------------------------------|--------------------------------|
|-------|------------------------------|--------------------------------|----------------------------------|--------------------------------|

|            |          | weighted probabilities | weighted probabilities | unweighted probabilities |
|------------|----------|------------------------|------------------------|--------------------------|
| D3S1358    | 15, 17   | $7.61 \times 10^0$     | $7.61 \times 10^0$     | $8.04 \times 10^0$       |
| D1S1656    | 11, 14   | $3.36 \times 10^1$     | $3.36 \times 10^1$     | $6.74 \times 10^1$       |
| D2S441     | 10, 11   | $6.89 \times 10^0$     | $6.89 \times 10^0$     | $7.23 \times 10^0$       |
| D10S1248   | 14, 15   | $8.13 \times 10^0$     | $8.13 \times 10^0$     | $8.39 \times 10^0$       |
| D13S317    | 11, 12   | $5.40 \times 10^0$     | $5.40 \times 10^0$     | $5.65 \times 10^0$       |
| Penta E    | 12, 14   | $4.75 \times 10^1$     | $4.75 \times 10^1$     | $4.75 \times 10^1$       |
| D16S539    | 9, 12    | $1.20 \times 10^1$     | $1.20 \times 10^1$     | $1.20 \times 10^1$       |
| D18S51     | 14, 17   | $2.90 \times 10^1$     | $2.90 \times 10^1$     | $2.90 \times 10^1$       |
| D2S1338    | 16, 20   | $9.40 \times 10^1$     | $9.40 \times 10^1$     | $9.40 \times 10^1$       |
| CSF1PO     | 10, 11   | $7.70 \times 10^0$     | $7.68 \times 10^0$     | $7.87 \times 10^0$       |
| Penta D    | 9, 13    | $1.66 \times 10^1$     | $1.66 \times 10^1$     | $1.66 \times 10^1$       |
| THO1       | 7, 9.3   | $8.25 \times 10^0$     | $8.25 \times 10^0$     | $8.25 \times 10^0$       |
| vWA        | 14, 17   | $2.00 \times 10^1$     | $2.00 \times 10^1$     | $2.00 \times 10^1$       |
| D21S11     | 27, 30   | $5.23 \times 10^1$     | $5.23 \times 10^1$     | $5.23 \times 10^1$       |
| D7S820     | 9, 10    | $1.04 \times 10^1$     | $1.04 \times 10^1$     | $1.40 \times 10^1$       |
| D5S818     | 10, 13   | $3.90 \times 10^1$     | $3.90 \times 10^{-1}$  | $3.93 \times 10^1$       |
| TPOX       | 8, 8     | $4.60 \times 10^0$     | $4.60 \times 10^0$     | $4.60 \times 10^0$       |
| D8S1179    | 13, 14   | $7.89 \times 10^0$     | $7.89 \times 10^0$     | $7.98 \times 10^0$       |
| D12S391    | 23, 24   | $1.58 \times 10^2$     | $1.58 \times 10^2$     | $1.42 \times 10^2$       |
| D19S433    | 12, 15.2 | $1.05 \times 10^2$     | $1.05 \times 10^2$     | $1.05 \times 10^2$       |
| FGA        | 19, 24   | $5.88 \times 10^1$     | $5.88 \times 10^1$     | $6.30 \times 10^1$       |
| D22S1045   | 11, 16   | $1.28 \times 10^1$     | $1.28 \times 10^{-1}$  | $1.30 \times 10^1$       |
| Profile LR |          | $2.43 \times 10^{28}$  | $2.43 \times 10^{28}$  | $8.02 \times 10^{28}$    |

**Supplementary Table S5.** Summary of LR<sub>s</sub> calculated for the same two-, three-, and four-person mixtures using MaSTR™ and EuroForMix to assess accuracy. The listed order of each contributor indicates its position in the mixture ratio, smallest to largest. The two- and three-person mixtures show results for both low allelic sharing (1678 & 1653/1679 & 1683 & 1657) and high allelic sharing (1660 & 1693/1668 & 1658 & 1659) combinations. Data shown is for undiluted mixtures and the approximate quantity of amplification DNA template in picograms is listed for each contributor. MaSTR™ values shown are overall (sub-sub-source) LR<sub>s</sub>. Analysis parameters were kept as close as possible between the two systems; only backwards (N-1) stutter was considered, no degradation options were selected, and equation NRC 4.2 was used for both.

| Mixture Condition          | Contributor | MaSTR™ LR             | EuroForMix LR         |
|----------------------------|-------------|-----------------------|-----------------------|
| 2 Person 1:1 (~500:500 pg) | 1678        | $5.54 \times 10^{14}$ | $5.48 \times 10^{17}$ |
|                            | 1653        | $2.45 \times 10^{15}$ | $1.87 \times 10^{16}$ |
| 2 Person 1:3 (~160:500 pg) | 1678        | $8.13 \times 10^{23}$ | $9.11 \times 10^{27}$ |
|                            | 1653        | $5.26 \times 10^{31}$ | $1.58 \times 10^{31}$ |
| 2 Person 1:1 (~500:500 pg) | 1660        | $9.50 \times 10^{12}$ | $2.97 \times 10^{13}$ |

|                                         |      |                       |                       |
|-----------------------------------------|------|-----------------------|-----------------------|
|                                         | 1693 | $7.63 \times 10^{13}$ | $1.87 \times 10^{17}$ |
| 2 Person 1:3 (~160:500 pg)              | 1660 | $7.46 \times 10^{25}$ | $6.30 \times 10^{20}$ |
|                                         | 1693 | $8.87 \times 10^{27}$ | $7.12 \times 10^{28}$ |
| 3 Person 1:1:1 (~500:500:500 pg)        | 1679 | $3.21 \times 10^{17}$ | $7.99 \times 10^{13}$ |
|                                         | 1683 | $9.55 \times 10^3$    | $4.00 \times 10^6$    |
|                                         | 1657 | $1.00 \times 10^{16}$ | $6.82 \times 10^{11}$ |
| 3 Person 1:1:2 (~250:250:500 pg)        | 1679 | $3.60 \times 10^{14}$ | $5.12 \times 10^{12}$ |
|                                         | 1683 | $7.54 \times 10^{10}$ | $1.46 \times 10^5$    |
|                                         | 1657 | $5.82 \times 10^{28}$ | $6.62 \times 10^{16}$ |
| 3 Person 1:1:1 (~500:500:500)           | 1668 | $4.48 \times 10^{10}$ | $2.53 \times 10^{10}$ |
|                                         | 1658 | $2.02 \times 10^9$    | $9.16 \times 10^8$    |
|                                         | 1659 | $2.54 \times 10^{13}$ | $2.97 \times 10^{14}$ |
| 3 Person 1:1:2 (~250:250:500)           | 1668 | $2.47 \times 10^{12}$ | $1.41 \times 10^9$    |
|                                         | 1658 | $5.04 \times 10^{10}$ | $3.28 \times 10^8$    |
|                                         | 1659 | $7.80 \times 10^{19}$ | $2.66 \times 10^{15}$ |
| 3 person 1:3:5 (~100:300:500 pg)        | 1668 | $2.72 \times 10^4$    | $2.44 \times 10^2$    |
|                                         | 1658 | $1.33 \times 10^{12}$ | $7.19 \times 10^8$    |
|                                         | 1659 | $7.33 \times 10^{22}$ | $5.09 \times 10^{18}$ |
| 4 Person 1:2:2:5 (~100:200:2000:500 pg) | 1669 | $3.90 \times 10^{10}$ | $3.33 \times 10^4$    |
|                                         | 1682 | $3.98 \times 10^{15}$ | $9.07 \times 10^8$    |
|                                         | 1683 | $1.58 \times 10^9$    | $4.55 \times 10^5$    |
|                                         | 1690 | $8.53 \times 10^{24}$ | $1.84 \times 10^{14}$ |

**Supplementary Table S6.** Summary of differences in average LR values (N=5 MaSTR™ runs)

between three amplification replicates in a representative range of mixtures. The LRs shown are for each of the contributors to each of the mixtures with the position (\*) and approximate quantity (pg) of the contributor denoted for the replicates' values. Mixture ratios were 1:1 for the two-person, 1:3:5 for the three-person, 1:1:3:10 for the four-person, and 1:2:2:5:10 for the five-person.

| Mixture Condition                         | Amplification 1<br>Average LR | Amplification 2<br>Average LR | Amplification 3<br>Average LR |
|-------------------------------------------|-------------------------------|-------------------------------|-------------------------------|
| Contributor 1678 2<br>Person ~500*:500 pg | $2.09 \times 10^{16}$         | $1.37 \times 10^{13}$         | $2.61 \times 10^{12}$         |

|                                                      |                       |                       |                       |
|------------------------------------------------------|-----------------------|-----------------------|-----------------------|
| Contributor 1653 2<br>Person ~500:500* pg            | $1.34 \times 10^{17}$ | $8.43 \times 10^{13}$ | $1.72 \times 10^{13}$ |
| Contributor 1679 3<br>Person ~25*:75:125 pg          | $1.34 \times 10^2$    | $1.34 \times 10^{-5}$ | $1.41 \times 10^{-4}$ |
| Contributor 1683 3<br>Person ~25:75*:125 pg          | $1.11 \times 10^{10}$ | $8.65 \times 10^{12}$ | $4.01 \times 10^{13}$ |
| Contributor 1657 3<br>Person ~25:75:125* pg          | $8.24 \times 10^{28}$ | $2.28 \times 10^{30}$ | $1.07 \times 10^{31}$ |
| Contributor 1682 4<br>Person ~13*:13:38:125 pg       | $4.42 \times 10^2$    | $1.23 \times 10^4$    | $4.89 \times 10^7$    |
| Contributor 1683 4<br>Person ~13:13*:38:125 pg       | $2.84 \times 10^4$    | $6.10 \times 10^3$    | $3.31 \times 10^0$    |
| Contributor 1690 4<br>Person ~13:13:38*:125 pg       | $1.61 \times 10^{13}$ | $4.34 \times 10^{11}$ | $1.46 \times 10^{15}$ |
| Contributor 1669 4<br>Person ~13:13:38:125* pg       | $5.35 \times 10^{23}$ | $5.64 \times 10^{24}$ | $4.66 \times 10^{24}$ |
| Contributor 1665 5<br>Person ~13*:25:25:63:125<br>pg | $1.96 \times 10^2$    | $6.45 \times 10^{-1}$ | $1.69 \times 10^{-1}$ |
| Contributor 1681 5<br>Person ~13:25*:25:63:125<br>pg | $4.88 \times 10^3$    | $1.02 \times 10^2$    | $1.03 \times 10^0$    |
| Contributor 1686 5<br>Person ~13:25:25*:63:125<br>pg | $2.01 \times 10^0$    | $2.18 \times 10^3$    | $3.23 \times 10^3$    |
| Contributor 1666 5<br>Person ~13:25:25:63*:125<br>pg | $5.36 \times 10^{11}$ | $4.29 \times 10^{13}$ | $9.41 \times 10^{13}$ |
| Contributor 1670 5<br>Person ~13:25:25:63:125*<br>pg | $3.56 \times 10^{17}$ | $9.85 \times 10^{15}$ | $2.29 \times 10^{16}$ |

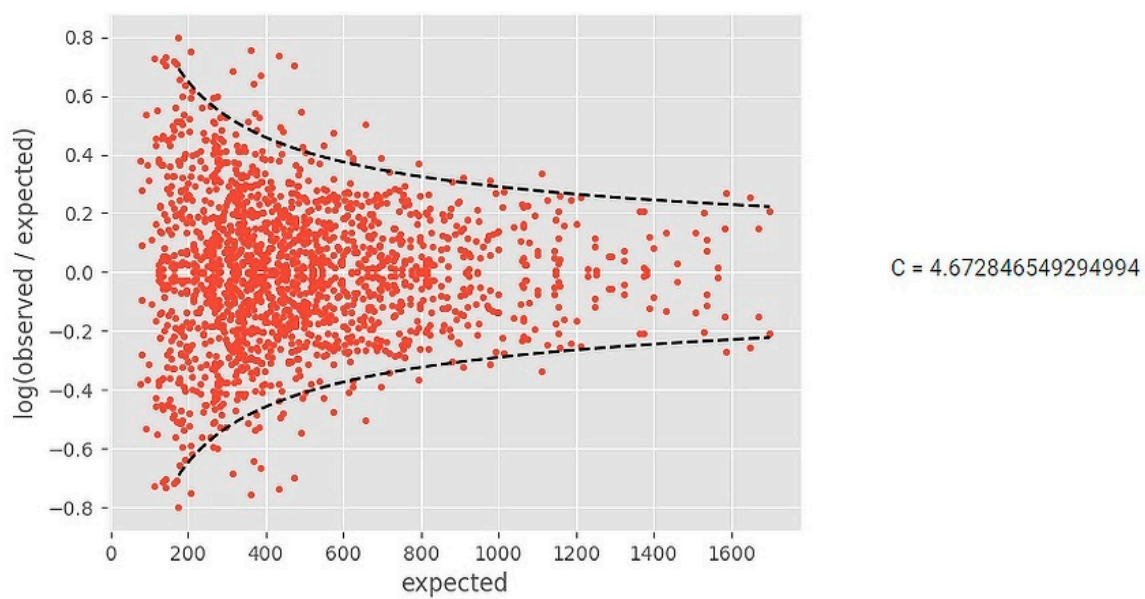

**Supplementary Figure S1.** MaSTR™ generated variance factor plot for 50 RFUs analytical threshold showing the expected peak heights (RFUs) on the X axis plotted against the log of the heterozygous peak balance on the Y axis.

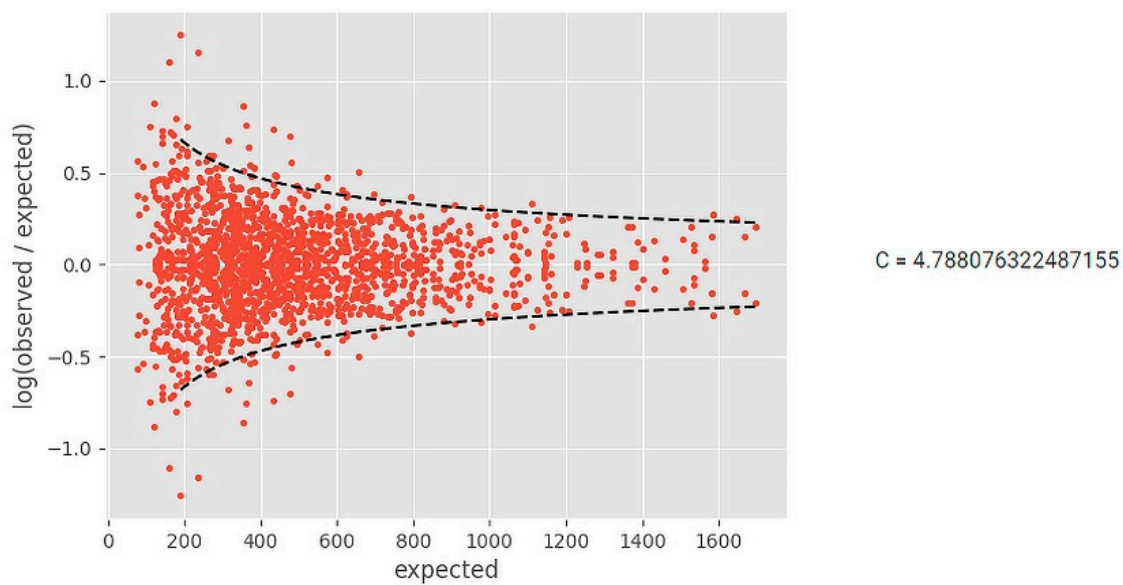

**Supplementary Figure S2.** MaSTR™ generated variance factor plot for 30 RFUs analytical threshold showing the expected peak heights (RFUs) on the X axis plotted against the log of the heterozygous peak balance on the Y axis.

**Supplementary Figure S3a.**

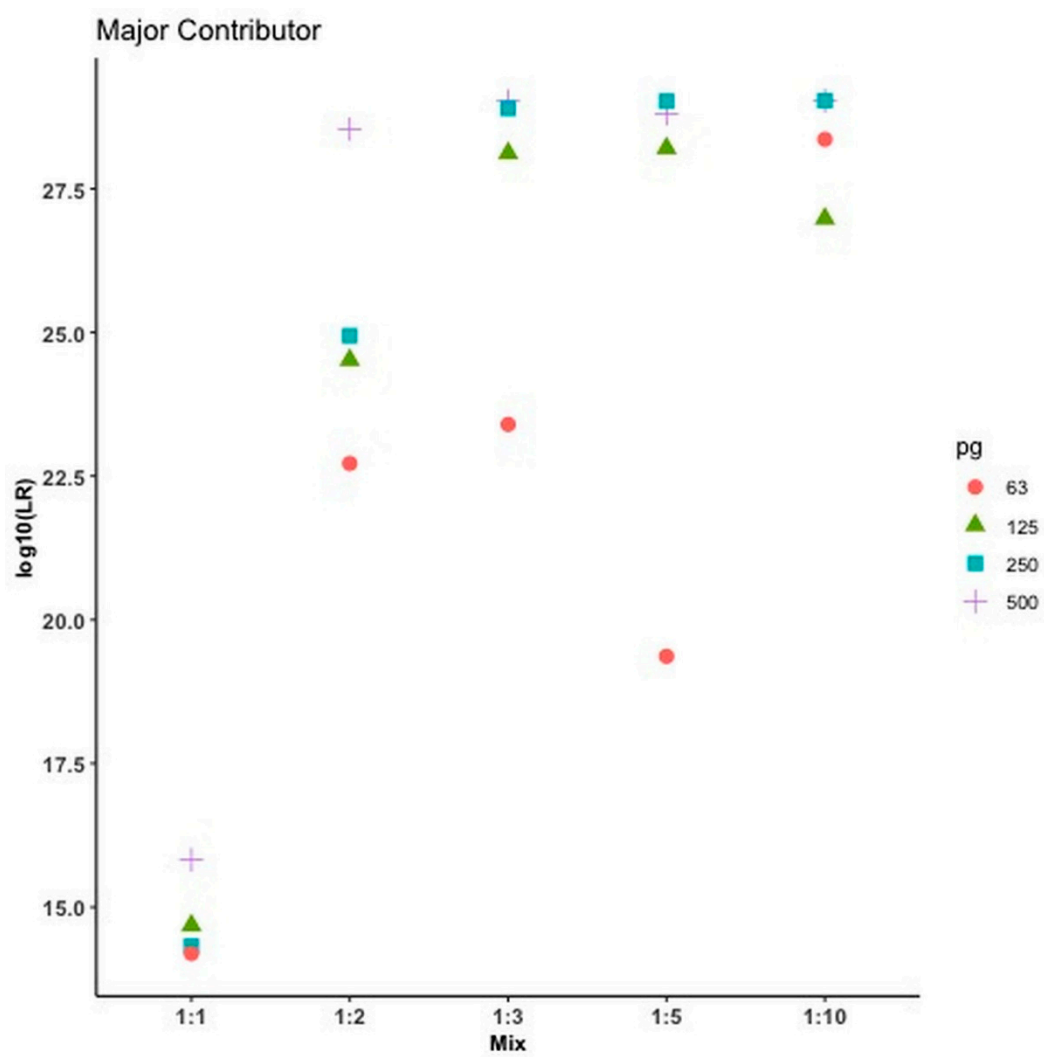



Supplementary Figure S3b.

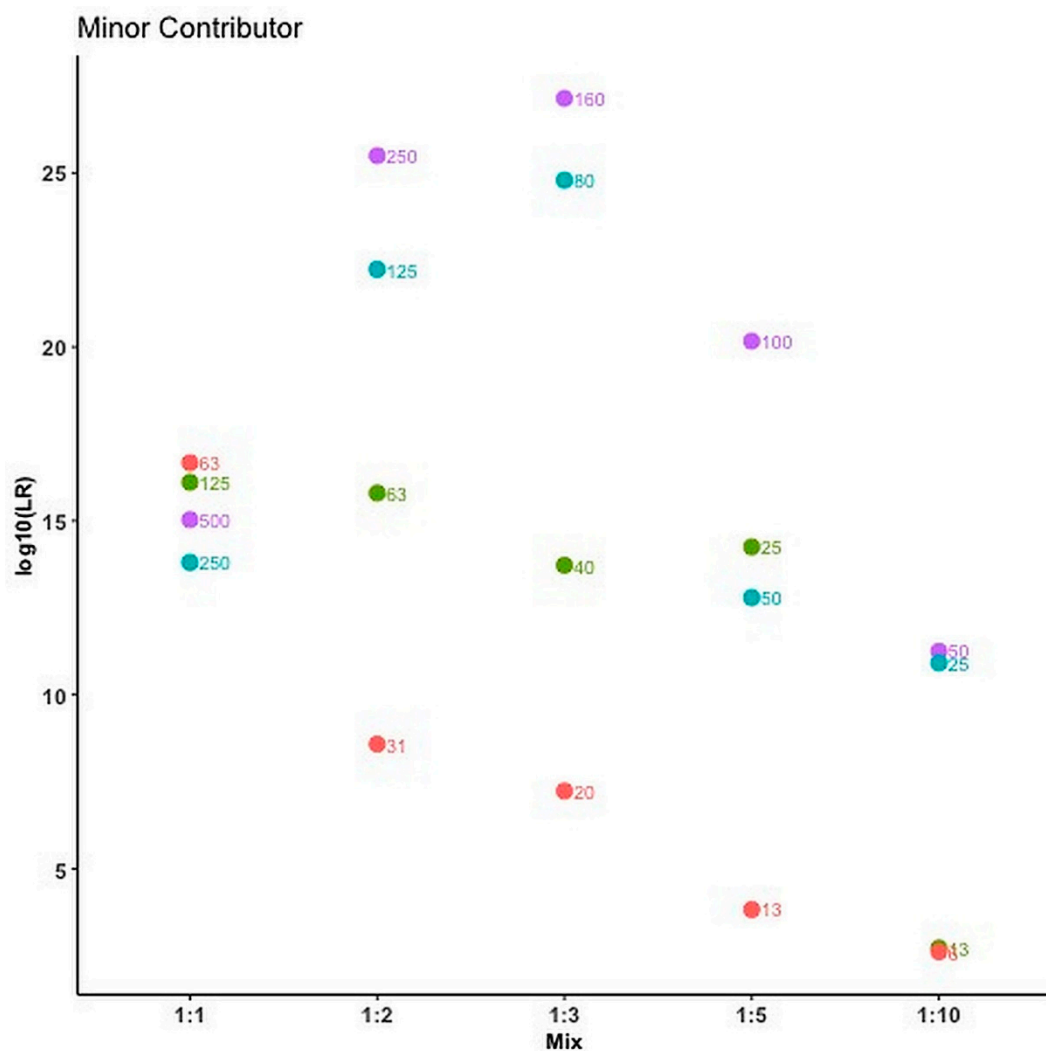

**Supplementary Figure S3.** Modeling performance of MaSTR™ using a two-person mixture (contributors 1660 and 1693). The average LR<sub>s</sub> (N=5) from the major contributor (1693) are shown in panel 3a and minor contributor (1660) in panel 3b. The DNA template quantities were consistent for the major contributor across the mixture ratios and are indicated in approximate picograms by color and shape on the right in panel 3a. The DNA template quantities for the minor contributor changed with the specific mixture ratio used and so are indicated in approximate picograms next to each data point

Supplemental Figure S4a.

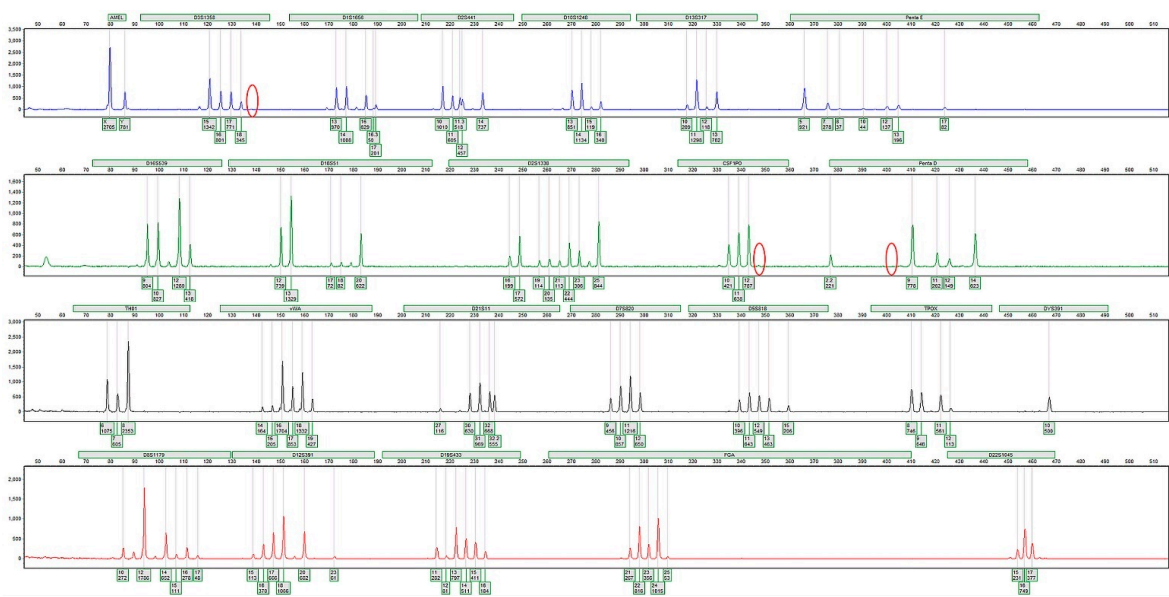

Supplemental Figure S4a.

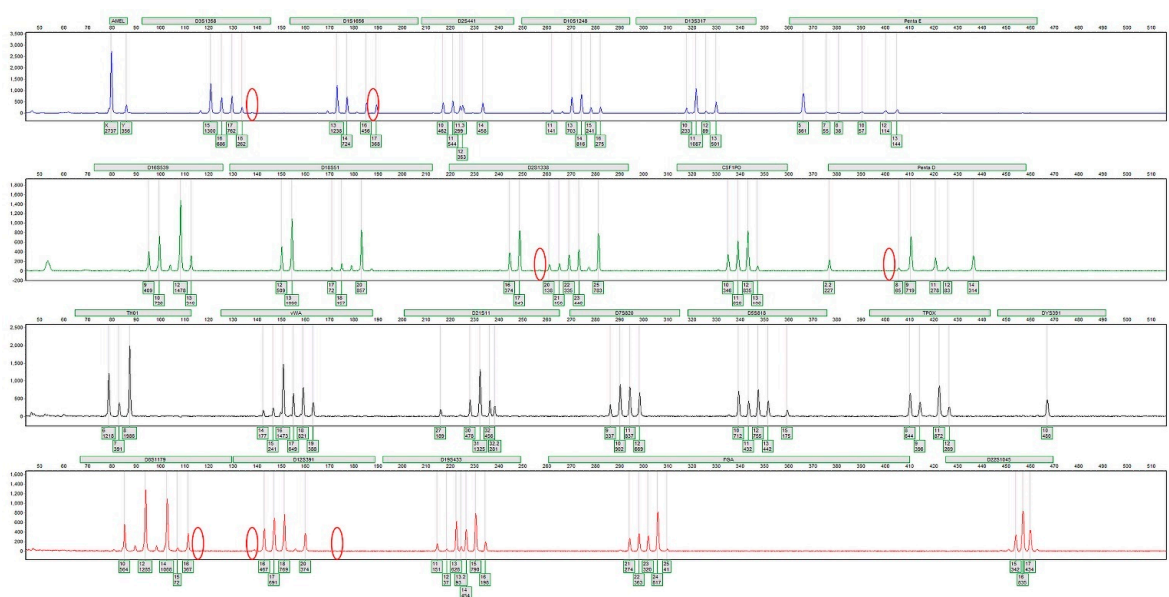

## Supplemental Figure S4c.

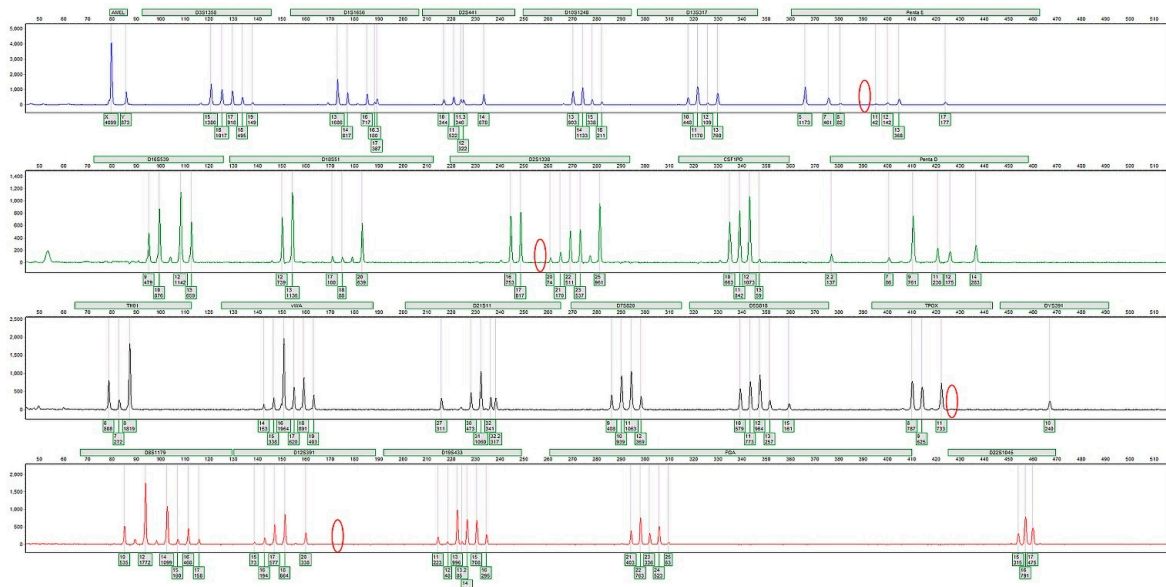

**Supplementary Figure 4.** Electropherograms for the five-person mixture with a contributor ratio of 1:1:5:5:10, diluted 1:2 (~25:25:125:125:250 pg). Panel 3a shows the allele peaks for amplification replicate #1. Panel 3b shows the allele peaks for amplification replicate #2. Panel 3c shows the alleles peaks for amplification replicate #3. The positions for allele drop out in contributor 1665 are indicated. Contributor 1665 full genotype: (D3S1358 16, 19), (D1S1656 14, 16.3), (D2S441 12, 12), (D10S1248 15, 15), (D13S317 11, 12), (Penta E 8, 10), (D16S539 9, 12), (D18S51 18, 20), (D2S1338 19, 21), (CSF1PO 12, 13), (Penta D 7, 9), (THO1 7, 7), (vWA 15, 15), (D21S11 27, 30), (D7S820 10, 10), (D5S818 11, 13), (TPOX 8, 12), (D8S1179 15, 17), (D12S391 15, 23), (D19S433 13, 15), (FGA 23, 25), and (D22S1045 17, 17).

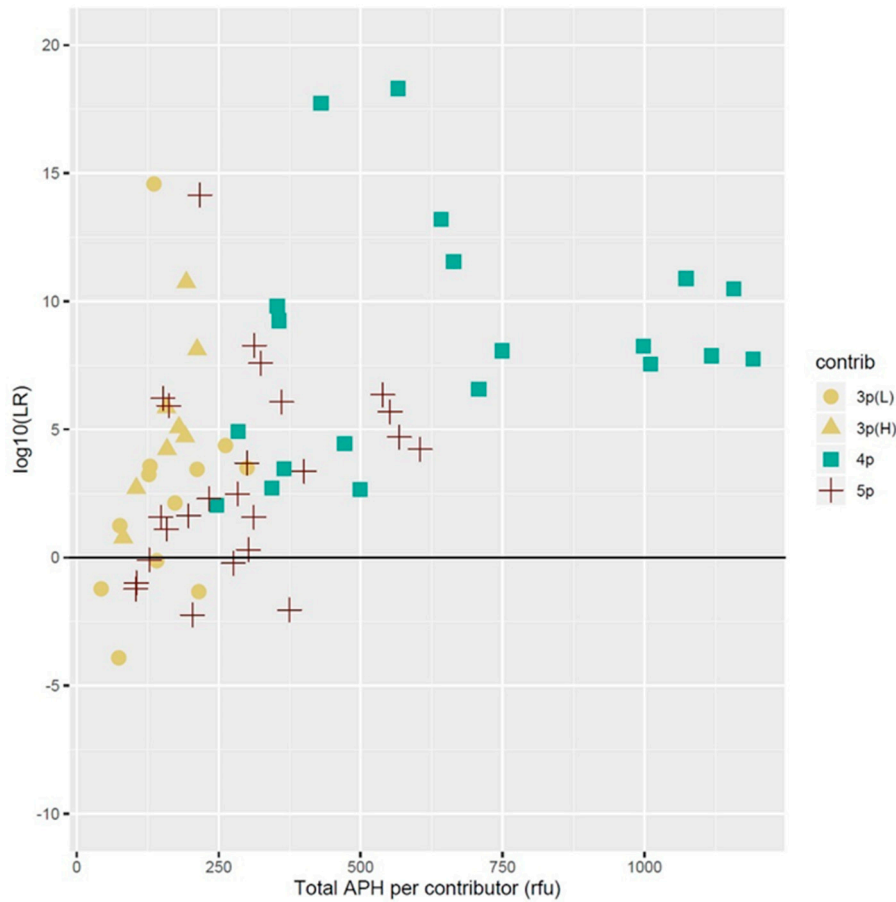

**Supplementary Figure S5.** The log10 of the average LR<sub>s</sub> (N=5) versus average peak height (APH) for individual contributors that were present in low template amounts (≤100 pg). Each data point represents the average peak height in RFUs representing all alleles detected for selected individual low-template contributor, regardless of allele sharing or specific mixture ratio, for three-person high share (H), three-person low share (L), four-person, and five-person mixtures. 20 – 25 values of each were selected for the three-, four-, and five-contributor mixtures that demonstrated the range of LR<sub>s</sub> observed in the study.

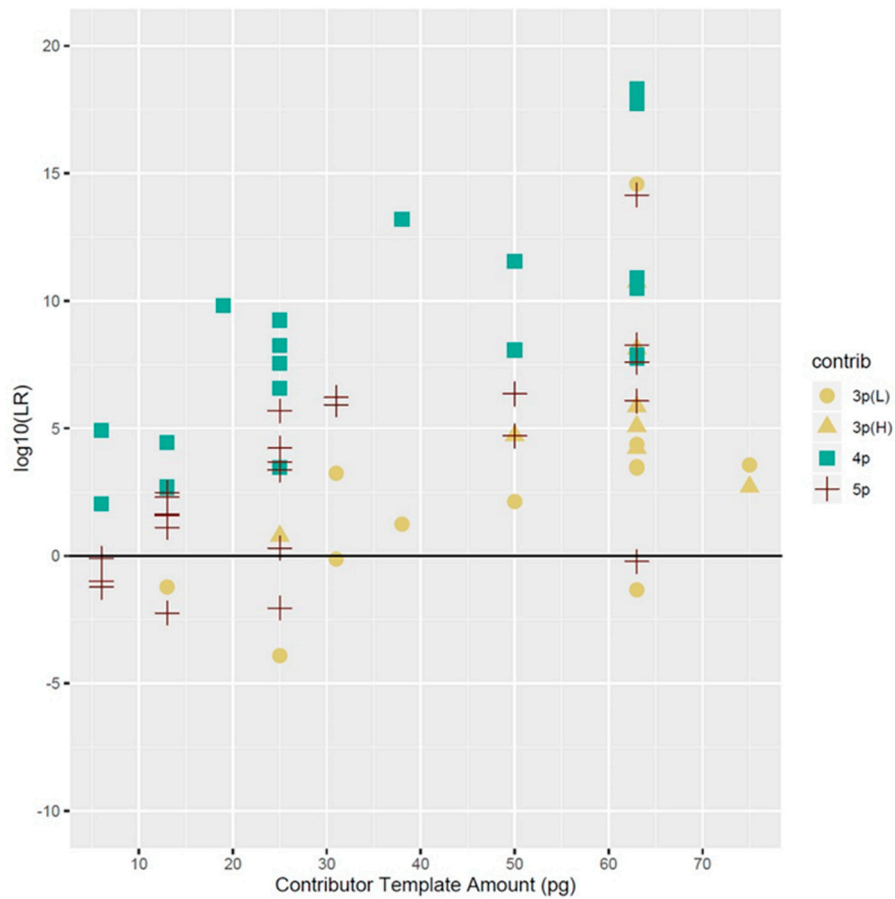

**Supplementary Figure S6.** The log10 of the average LR<sub>s</sub> (N=5) versus DNA template quantity (pg) for individual contributors that were present in low template amounts ( $\leq 100$  pg). The approximate quantities of DNA for individual low-template contributors, regardless of mixture ratio are shown. 20 – 25 values each were selected for the three-, four-, and five-contributor mixtures that demonstrated the range of LR<sub>s</sub> observed in the study.

Profile

1669\_053018\_AlleleReport.txt (Reference)

×

×

Population

All data

×

×

Overall Likelihood Ratio

| Calculation            | Numerator | Denominator | Likelihood Ratio |
|------------------------|-----------|-------------|------------------|
| Overall LR (vs Random) | 2.01e-105 | 1.24e-88    | 1.62e-17         |

Marker-Specific Likelihood Ratios

| Marker                       | Genotype   | Numerator | Denominator | Likelihood Ratio |
|------------------------------|------------|-----------|-------------|------------------|
| D3S1358                      | 15, 15     | 3.32e-3   | 1.42e-3     | 2.34e+0          |
| D1S1656                      | 18.3, 18.3 | 2.42e-7   | 9.47e-5     | 2.55e-2          |
| D2S441                       | 10, 14     | 1.95e-4   | 1.07e-3     | 1.83e-1          |
| D18S1248                     | 13, 14     | 3.55e-2   | 2.95e-3     | 1.21e+1          |
| D13S317                      | 11, 12     | 1.08e-5   | 1.19e-4     | 9.05e-2          |
| Penta_E                      | 10, 11     | 1.25e-7   | 2.54e-5     | 4.92e-2          |
| D16S539                      | 11, 12     | 3.58e-4   | 5.34e-5     | 6.69e+0          |
| D18S51                       | 15, 16     | 1.78e-4   | 3.43e-5     | 5.17e+0          |
| D2S1338                      | 17, 24     | 3.22e-6   | 6.13e-6     | 5.25e-1          |
| CSF1PO                       | 10, 11     | 4.15e-3   | 1.08e-3     | 3.85e+0          |
| Penta_D                      | 9, 12      | 9.55e-6   | 1.29e-5     | 7.05e-1          |
| TH01                         | 9.3, 9.3   | 1.51e-4   | 4.62e-4     | 3.26e-1          |
| VWA                          | 15, 17     | 1.90e-5   | 4.65e-5     | 4.09e-1          |
| D21S11                       | 30, 33.2   | 1.48e-3   | 2.56e-5     | 5.79e+1          |
| D7S820                       | 9, 11      | 1.71e-3   | 5.64e-4     | 3.04e+0          |
| D5S818                       | 11, 13     | 4.27e-3   | 1.01e-3     | 4.23e+0          |
| TPOX                         | 8, 9       | 2.25e-6   | 1.33e-5     | 1.69e-1          |
| D8S1179                      | 11, 14     | 2.85e-3   | 9.96e-5     | 2.87e+1          |
| D12S391                      | 17, 18     | 1.47e-4   | 7.74e-6     | 1.90e+1          |
| D19S433                      | 14, 14     | 1.68e-2   | 1.40e-3     | 1.20e+1          |
| FGA                          | 18, 21     | 1.56e-5   | 7.75e-6     | 2.53e+0          |
| D22S1045                     | 15, 15     | 7.18e-3   | 5.97e-4     | 1.20e+1          |
| Simple LR (Multiply Markers) |            | 4.01e-94  | 4.13e-89    | 9.72e+4          |

**Supplementary Figure S7.** Reported LR<sub>s</sub> for contributor 1669 in a four-person mixture with a 1:2:2:5 ratio (~100:200:200:500 pg) as displayed in MaSTR™ when analyzed with N-1 true contributors. The LR values for 1669 shown are for one of the five replicate analyses conducted and so differ from the averaged values shown in Table 5. Contributor 1669 occupied the first position in this mixture, [1]:2:2:5 (~100 pg), and no allele drop-out was observed for it.

Profile

1682\_053018\_AlleleReport.txt (Alternate)

Population

All data

Overall Likelihood Ratio

| Calculation            | Numerator | Denominator | Likelihood Ratio |
|------------------------|-----------|-------------|------------------|
| Overall LR (vs Random) | 1.72e-75  | 1.24e-88    | 1.40e+13         |

Marker-Specific Likelihood Ratios

| Marker                       | Genotype | Numerator | Denominator | Likelihood Ratio |
|------------------------------|----------|-----------|-------------|------------------|
| D3S1358                      | 15, 17   | 1.40e-2   | 1.42e-3     | 9.87e+0          |
| D1S1656                      | 14, 15   | 7.71e-6   | 9.47e-6     | 8.13e-1          |
| D2S441                       | 11, 11   | 3.88e-3   | 1.07e-3     | 3.64e+0          |
| D18S1248                     | 13, 14   | 3.56e-2   | 2.95e-3     | 1.21e+1          |
| D13S317                      | 12, 12   | 2.57e-4   | 1.19e-4     | 2.16e+0          |
| Penta_E                      | 7, 12    | 2.37e-5   | 2.54e-6     | 9.33e+0          |
| D16S539                      | 10, 14   | 5.33e-3   | 5.34e-5     | 9.97e+1          |
| D18S51                       | 13, 15   | 3.72e-4   | 3.43e-5     | 1.08e+1          |
| D2S1338                      | 17, 18   | 3.00e-4   | 6.13e-6     | 4.89e+1          |
| CSF1PO                       | 10, 12   | 2.81e-3   | 1.08e-3     | 2.61e+0          |
| Penta_D                      | 5, 11    | 1.35e-4   | 1.29e-5     | 1.05e+1          |
| TH01                         | 7, 9.3   | 9.40e-5   | 4.62e-4     | 2.04e-1          |
| VWA                          | 17, 19   | 1.12e-3   | 4.65e-5     | 2.41e+1          |
| D21S11                       | 30, 31.2 | 6.31e-4   | 2.56e-5     | 2.46e+1          |
| D7S820                       | 9, 11    | 1.71e-3   | 5.64e-4     | 3.04e+0          |
| D5S818                       | 10, 12   | 7.46e-3   | 1.01e-3     | 7.41e+0          |
| TPOX                         | 7, 9     | 2.59e-3   | 1.33e-5     | 1.95e+2          |
| D8S1179                      | 12, 12   | 1.73e-5   | 9.96e-5     | 1.74e-1          |
| D12S391                      | 17, 18   | 1.47e-4   | 7.74e-6     | 1.90e+1          |
| D19S433                      | 13, 13   | 5.54e-3   | 1.40e-3     | 3.96e+0          |
| FGA                          | 21, 23   | 3.20e-4   | 7.75e-6     | 4.14e+1          |
| D22S1045                     | 15, 17   | 1.09e-2   | 5.97e-4     | 1.83e+1          |
| Simple LR (Multiply Markers) |          | 2.22e-69  | 4.13e-89    | 5.38e+19         |

**Supplementary Figure S8.** Reported LR<sub>s</sub> for contributor 1682 in a four-person mixture with a 1:2:2:5 ratio (~100:200:200:500 pg) as displayed in MaSTR™ when analyzed with N-1 true contributors. The

LR values for 1682 shown are for one of the five replicate analyses conducted and so differ from the averaged values shown in Table 5. Contributor 1682 occupied the second position in this mixture, 1:[2]:2:5 (~200 pg), and no allele drop-out was observed for it.

Profile

1683\_053018\_AlleleReport.txt (Alternate)

Population

All data

Overall Likelihood Ratio

| Calculation            | Numerator | Denominator | Likelihood Ratio |
|------------------------|-----------|-------------|------------------|
| Overall LR (vs Random) | 1.29e-94  | 1.24e-88    | 1.04e-6          |

Marker-Specific Likelihood Ratios

| Marker                       | Genotype | Numerator | Denominator | Likelihood Ratio |
|------------------------------|----------|-----------|-------------|------------------|
| D3S1358                      | 16, 17   | 2.31e-3   | 1.42e-3     | 1.63e+0          |
| D1S1656                      | 13, 17.3 | 9.13e-8   | 9.47e-6     | 9.64e-3          |
| D2S441                       | 10, 10   | 1.59e-2   | 1.07e-3     | 1.48e+1          |
| D10S1248                     | 13, 15   | 2.12e-2   | 2.95e-3     | 7.21e+0          |
| D13S317                      | 8, 13    | 1.17e-3   | 1.19e-4     | 9.79e+0          |
| Penta_E                      | 7, 15    | 1.03e-6   | 2.54e-6     | 4.05e-1          |
| D16S539                      | 11, 11   | 2.86e-4   | 5.34e-5     | 5.35e+0          |
| D18S51                       | 16, 17   | 1.54e-6   | 3.43e-5     | 4.47e-2          |
| D2S1328                      | 18, 24   | 4.31e-4   | 6.13e-5     | 7.04e+1          |
| CSF1FO                       | 11, 12   | 1.71e-3   | 1.08e-3     | 1.58e+0          |
| Penta_D                      | 9, 12    | 9.06e-6   | 1.29e-5     | 7.05e-1          |
| TH01                         | 6, 9.3   | 8.51e-3   | 4.62e-4     | 1.84e+1          |
| vWA                          | 18, 19   | 1.07e-5   | 4.65e-5     | 2.31e-1          |
| D21S11                       | 29, 30   | 1.33e-6   | 2.55e-5     | 5.19e-2          |
| D7S920                       | 10, 12   | 1.24e-3   | 5.64e-4     | 2.20e+0          |
| D5S818                       | 11, 13   | 4.27e-3   | 1.01e-3     | 4.23e+0          |
| TPOX                         | 10, 11   | 1.71e-4   | 1.33e-5     | 1.29e+1          |
| D8S1179                      | 13, 13   | 1.45e-7   | 9.96e-5     | 1.45e-3          |
| D12S391                      | 17, 23   | 6.21e-4   | 7.74e-5     | 8.02e+1          |
| D19S433                      | 14, 14   | 1.68e-2   | 1.40e-3     | 1.20e+1          |
| FGA                          | 21, 23   | 3.20e-4   | 7.75e-6     | 4.14e+1          |
| D22S1045                     | 15, 17   | 1.09e-2   | 5.97e-4     | 1.83e+1          |
| Simple LR (Multiply Markers) |          | 1.45e-82  | 4.13e-89    | 3.52e+6          |

**Supplementary Figure S9.** Reported LRs for contributor 1683 in a four-person mixture with a 1:2:2:5 ratio (~100:200:200:500 pg) as displayed in MaSTR™ when analyzed with N-1 true contributors. The LR values for 1683 shown are for one of the five replicate analyses conducted and so differ from the averaged values shown in Table 5. Contributor 1683 occupied the third position in this mixture, 1:2:[2]:5 (~200 pg), and no allele drop-out was observed for it.

Profile

1690\_053018\_AlleleReport.txt (Alternate)

Population

All data

Overall Likelihood Ratio

| Calculation            | Numerator | Denominator | Likelihood Ratio |
|------------------------|-----------|-------------|------------------|
| Overall LR (vs Random) | 2.24e+63  | 1.24e+88    | 1.81e+25         |

Marker-Specific Likelihood Ratios

| Marker                       | Genotype | Numerator | Denominator | Likelihood Ratio |
|------------------------------|----------|-----------|-------------|------------------|
| D3S1358                      | 15, 16   | 8.23e-3   | 1.42e-3     | 5.80e+0          |
| D1S1656                      | 16, 17.3 | 3.17e-4   | 9.47e-6     | 3.35e+1          |
| D2S441                       | 11, 14   | 6.63e-3   | 1.07e-3     | 6.22e+0          |
| D10S1248                     | 13, 14   | 3.56e-2   | 2.95e-3     | 1.21e+1          |
| D1S317                       | 10, 12   | 3.32e-3   | 1.19e-4     | 2.78e+1          |
| Penta_E                      | 14, 14   | 1.88e-4   | 2.54e-6     | 7.41e+1          |
| D16S539                      | 11, 12   | 3.58e-4   | 5.34e-5     | 6.69e+0          |
| D18S51                       | 15, 17   | 7.71e-4   | 3.43e-5     | 2.25e+1          |
| D2S1338                      | 20, 25   | 2.70e-4   | 6.13e-6     | 4.41e+1          |
| CSF1PO                       | 11, 11   | 1.69e-2   | 1.08e-3     | 1.57e+1          |
| Penta_D                      | 10, 13   | 3.66e-4   | 1.29e-5     | 2.86e+1          |
| TH01                         | 6, 6     | 5.78e-3   | 4.62e-4     | 1.25e+1          |
| vWA                          | 18, 18   | 1.37e-3   | 4.65e-5     | 2.94e+1          |
| D21S11                       | 29, 29   | 5.91e-4   | 2.56e-5     | 2.31e+1          |
| D7S820                       | 10, 11   | 6.09e-3   | 5.64e-4     | 1.08e+1          |
| D5S818                       | 11, 12   | 6.30e-3   | 1.01e-3     | 6.26e+0          |
| TPOX                         | 8, 8     | 5.98e-5   | 1.33e-5     | 4.50e+0          |
| D8S1179                      | 12, 15   | 2.49e-3   | 9.96e-5     | 2.50e+1          |
| D12S991                      | 16, 19   | 6.26e-4   | 7.74e-6     | 8.09e+1          |
| D19S433                      | 14, 14   | 1.68e-2   | 1.40e-3     | 1.20e+1          |
| FGA                          | 18, 23   | 1.72e-3   | 7.75e-6     | 2.22e+2          |
| D22S1045                     | 15, 15   | 7.18e-3   | 5.97e-4     | 1.20e+1          |
| Simple LR (Multiply Markers) |          | 6.21e+61  | 4.13e+89    | 1.50e+28         |

**Supplementary Figure S10.** Reported LRs for contributor 1690 in a four-person mixture with a 1:2:2:5 ratio (~100:200:200:500 pg) as displayed in MaSTR™ when analyzed with N-1 true contributors. The LR values for 1690 shown are for one of the five replicate analyses conducted and so differ from the averaged values shown in Table 5. Contributor 1690 occupied the fourth position in this mixture, 1:2:2:[5] (~500 pg), and no allele drop-out was observed for it.
